# Supplementary material
Source: Springer Nature journal article supplement (https://www.springerprofessional.de/resource/supplementary/13638_2012_767_MOESM10_ESM.pdf/11898388)

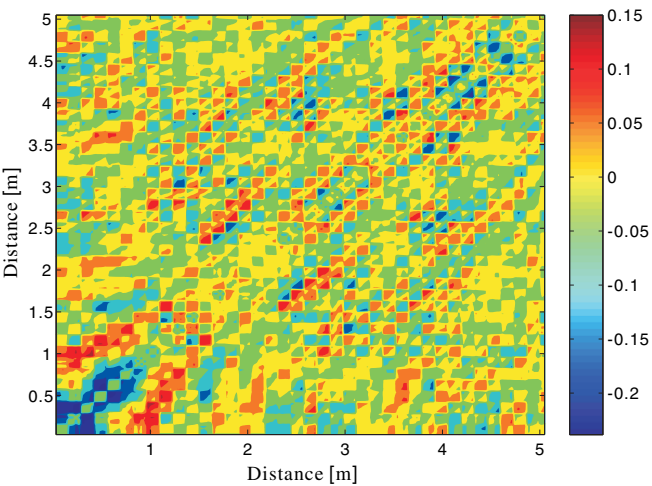

(a)  $\rho - \rho_{\text{cmd}}$

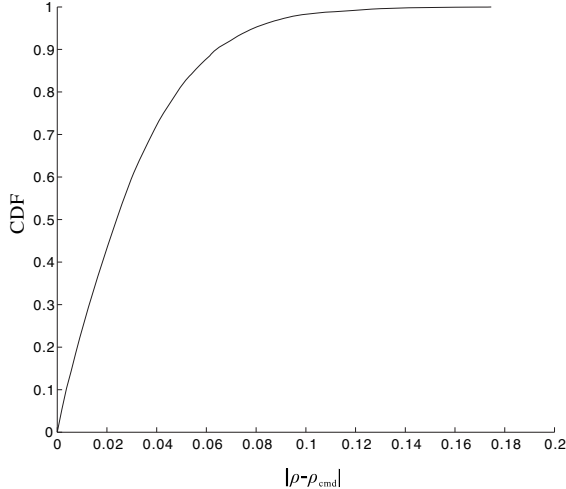

(b) CDF of  $|\rho - \rho_{\text{cmd}}|$

Supplement: MOESM10 [file 11898388]
